# Supplementary material
Source: PubMed Central journal article supplement (PMC6405304)

Fig. S11

A

Notch targets

Kras-MP

KD-MP

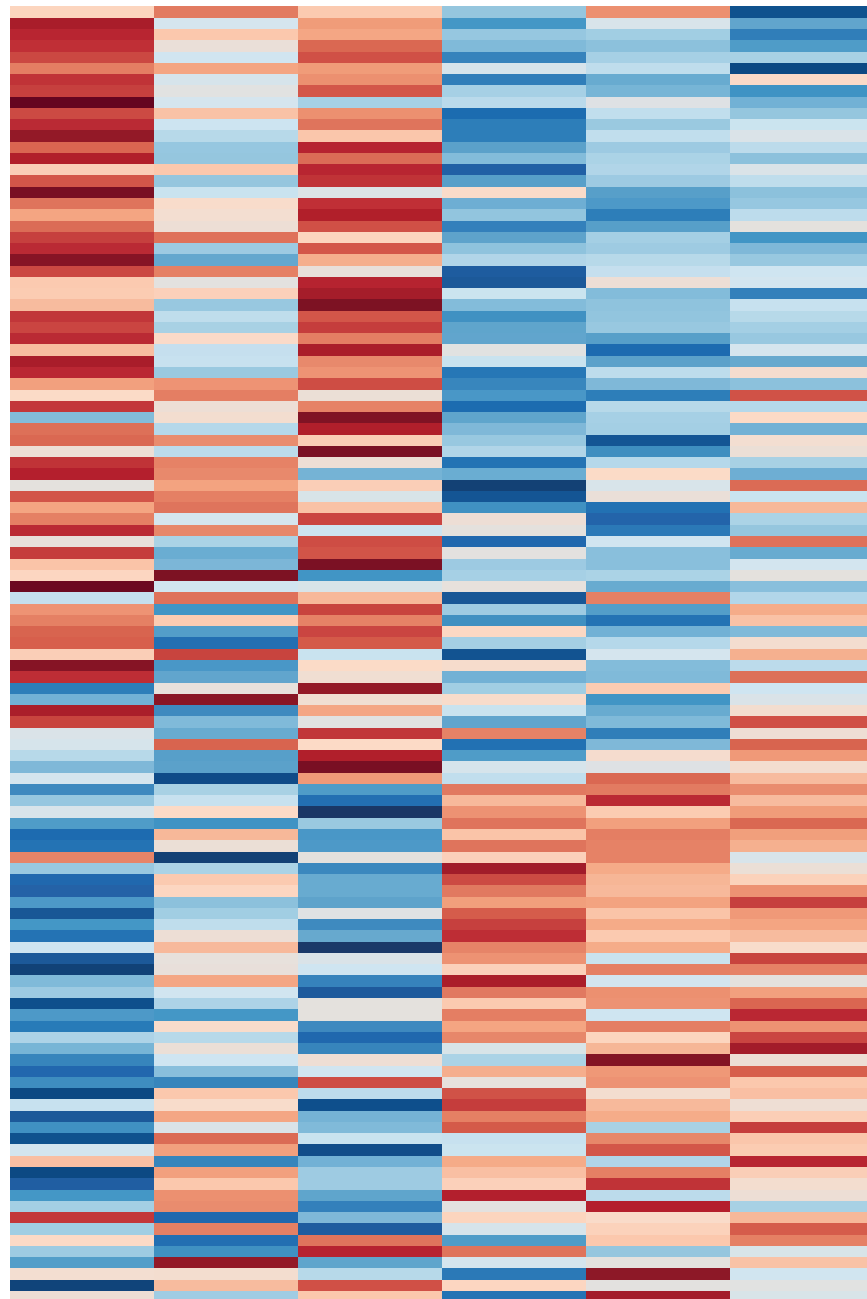

B

Rpbj targets

Kras-MP

KD-MP

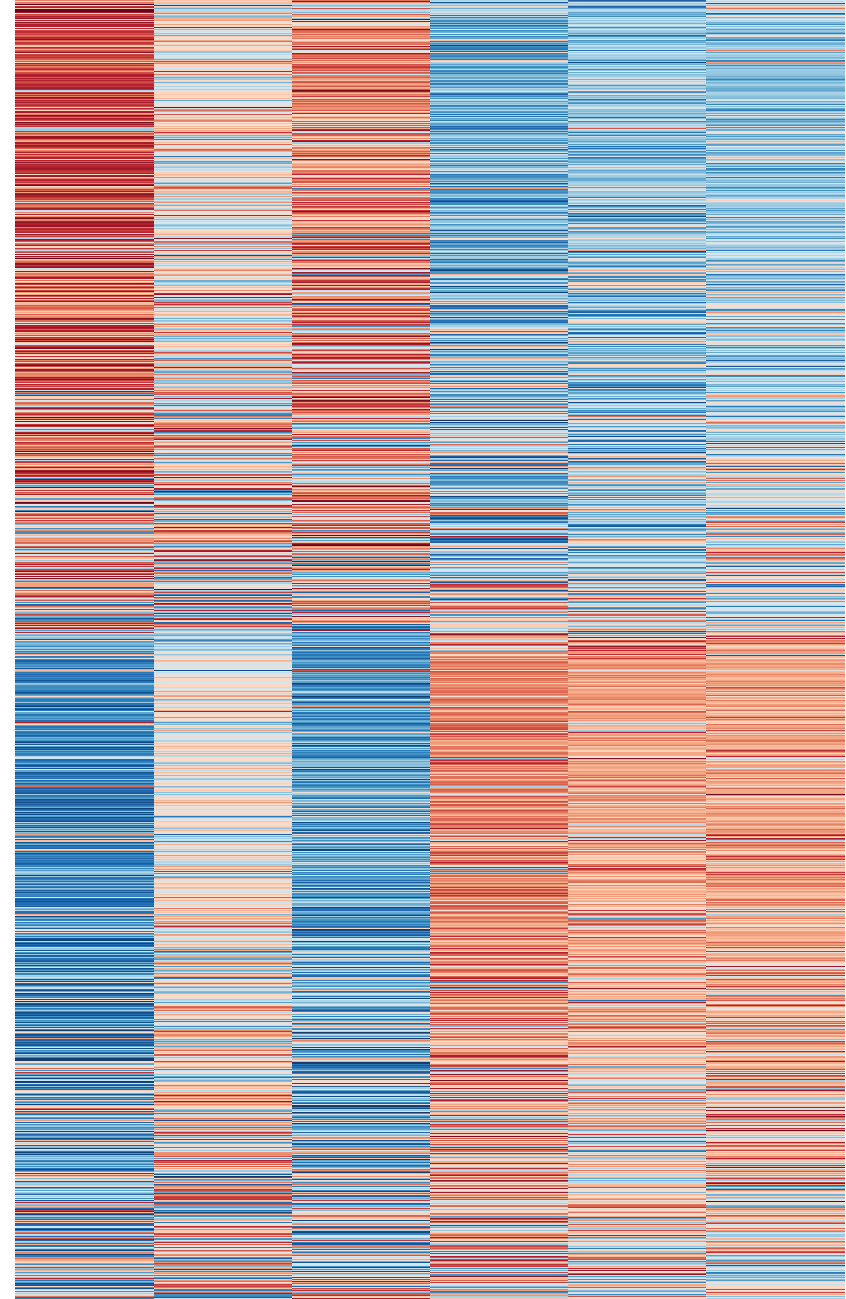

Supplement: NIHMS933371-supplement-12.pdf [file NIHMS933371-supplement-12.pdf]

**Fig. S2**

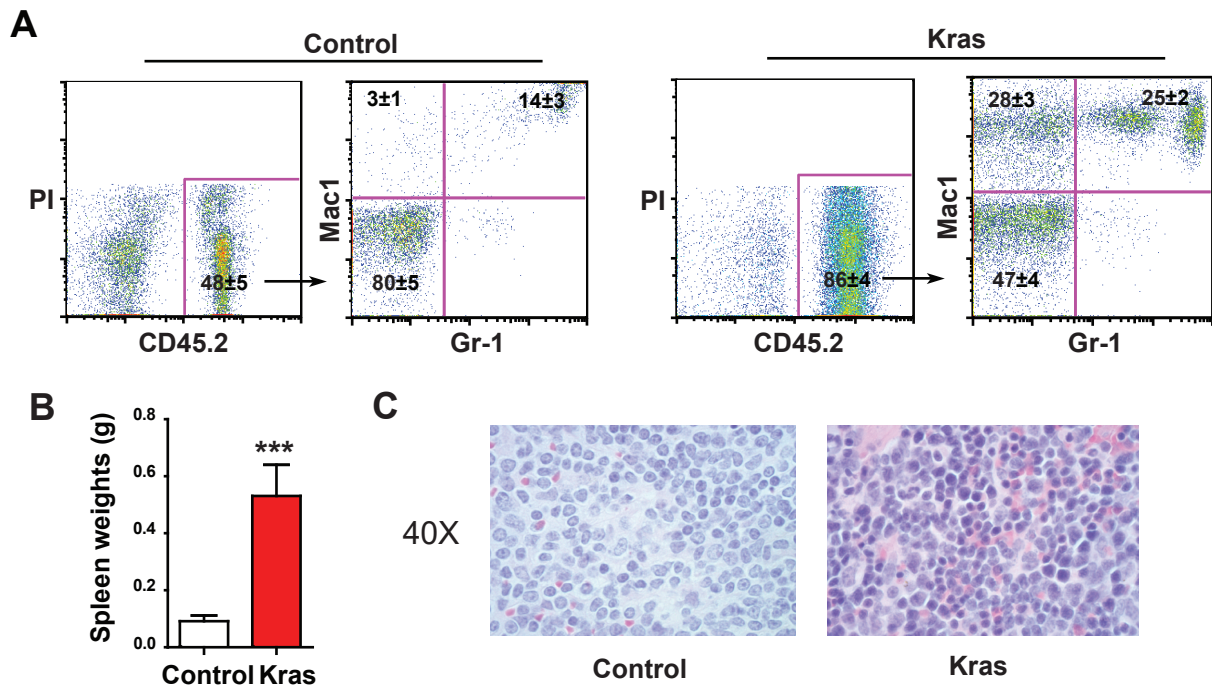

Supplement: NIHMS933371-supplement-3.pdf [file NIHMS933371-supplement-3.pdf]

# Fig. S3

□ Control, n=5-7    ■ Kras, n=6-15    ■ Kras; D/+, n=6-8    ■ Kras; P-/-, n=5-6

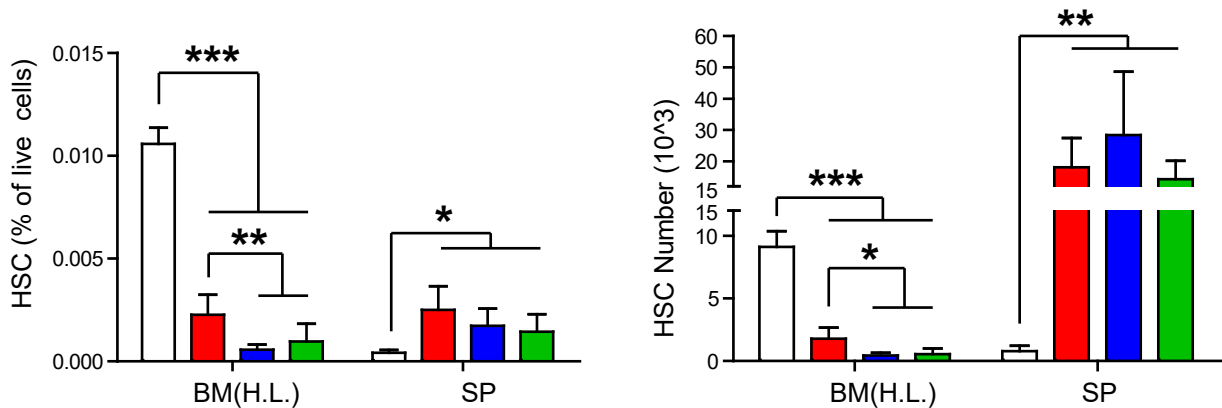

Supplement: NIHMS933371-supplement-4.pdf [file NIHMS933371-supplement-4.pdf]

# Fig. S7

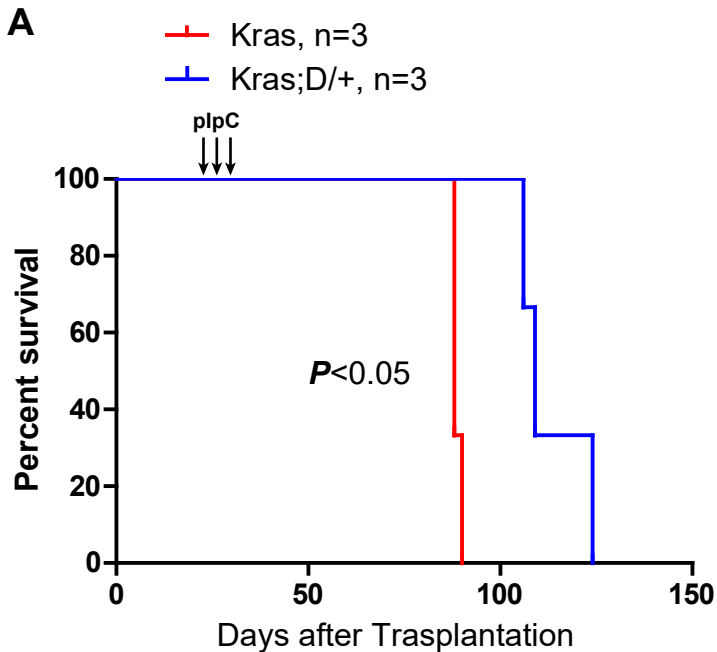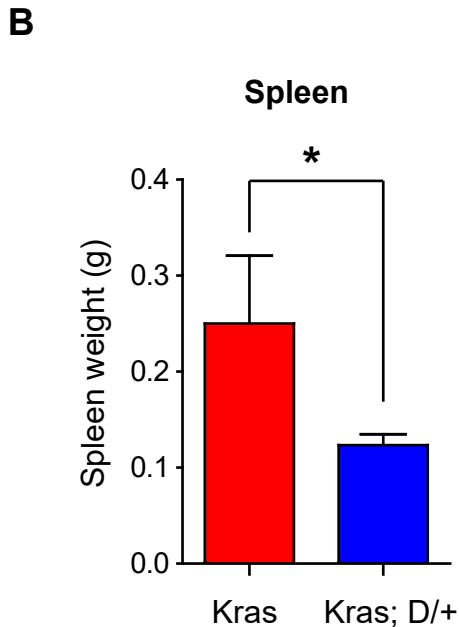

Supplement: NIHMS933371-supplement-8.pdf [file NIHMS933371-supplement-8.pdf]

**Fig.S8**

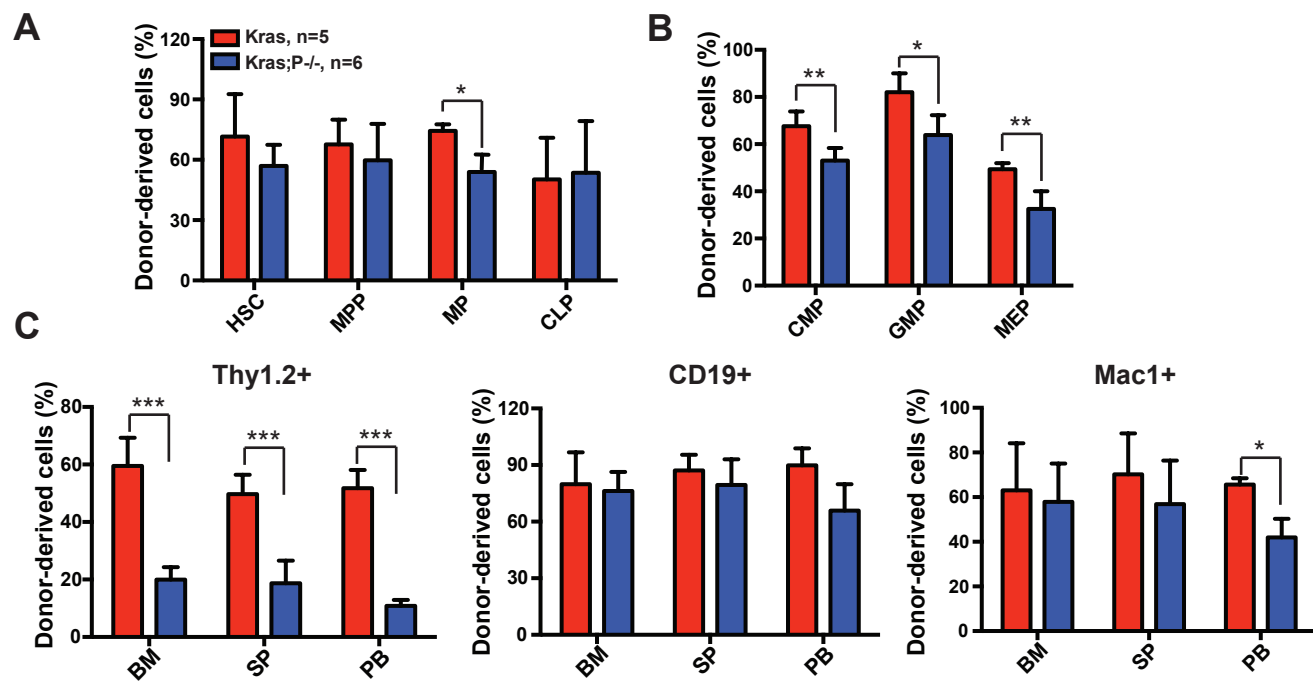

Supplement: NIHMS933371-supplement-9.pdf [file NIHMS933371-supplement-9.pdf]
